# Supplementary material for: Overexpression of MCL-1 in canine hepatocellular carcinoma and its efficacy as a prognostic marker
Source: Springer Nature journal article supplement (doi:10.1186/s12917-025-04798-6), 2025-05-16
Supplement: MOESM1 [file 12917_2025_4798_MOESM1_ESM.pdf]

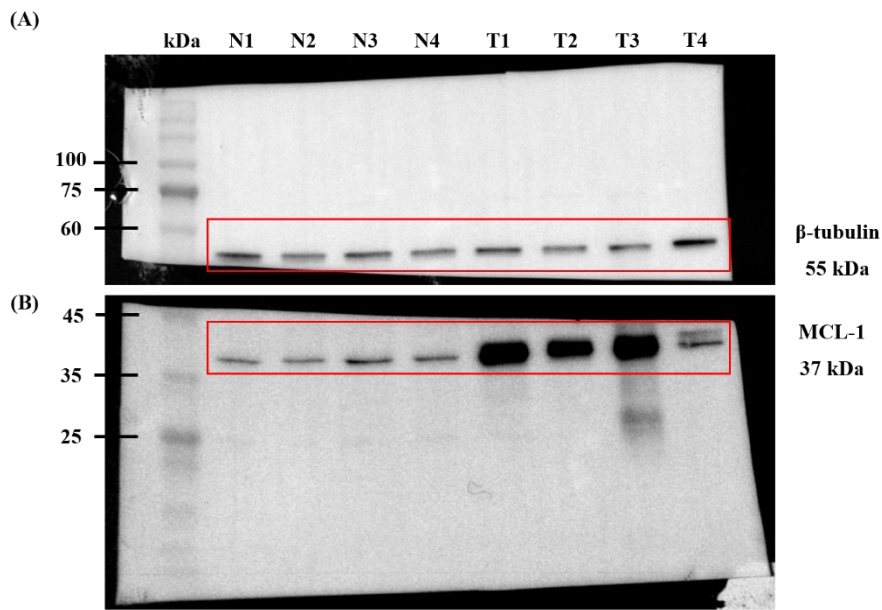

**Supplementary Figure 1.** (A) Full length blot of  $\beta$ -tubulin antibody. (B) Full length blot of MCL-1 antibody. Red boxes indicate the cropped blots shown in Figure 1. of this study. Protein marker (PM2700, SMOBIO, ExcelBand<sup>TM</sup> 3-color Broad Range Protein Marker). Abbreviation: N, normal liver tissue, T, tumor tissue (hepatocellular carcinoma), MCL-1, myeloid cell leukemia-1.
